# Supplementary material for: Mechanic-Driven Biodegradable Polyglycolic Acid/Silk Fibroin Nanofibrous Scaffolds Containing Deferoxamine Accelerate Diabetic Wound Healing
Source: MDPI journal article supplement (doi:10.3390/pharmaceutics14030601), 2022-03-10
Supplement: s1 [file s1]

# Mechanic-Driven Biodegradable Polyglycolic Acid/Silk Fibroin Nanofibrous Scaffolds Containing Deferoxamine Accelerate Diabetic Wound Healing

Shenfang Zha, Yohanes Kristo Sugiarto Utomo, Li Yang, Guizhao Liang\* and Wanqian Liu\*

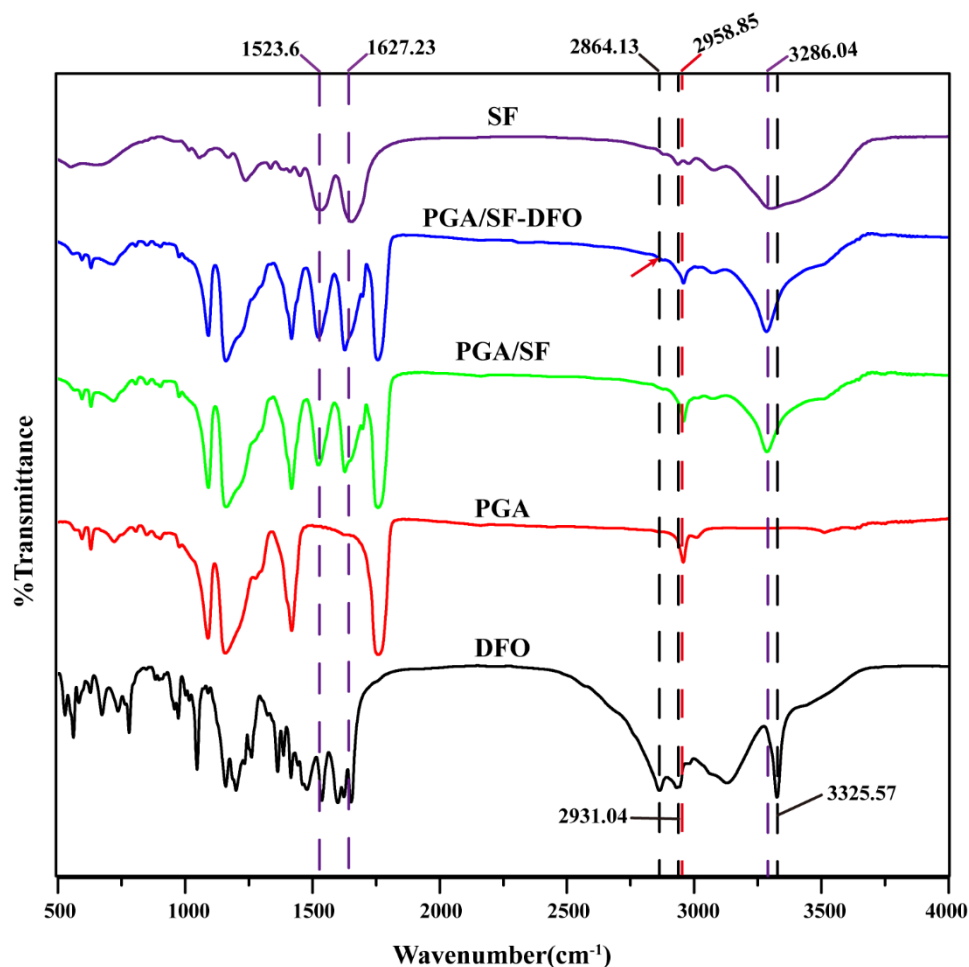

**Figure S1.** FTIR spectra for SF, PGA/SF, PGA/SF-DFO, PGA, DFO. Red arrow: the weak characteristic peak of DFO representing symmetric stretching vibrations at 2864.13 cm<sup>-1</sup>.

**Table S1.** Ultimate Tensile Strength, Strain at Break and Young's Modulus of Scaffolds.

|            | ultimate tensile strength (MPa) | strain at break (%) | Young's modulus (MPa) |
|------------|---------------------------------|---------------------|-----------------------|
| PGA/SF     | 2.18 ± 0.22                     | 75.68 ± 15.91       | 91.58 ± 13.07         |
| PGA/SF-DFO | 2.68 ± 0.94                     | 77.68 ± 21.85       | 97.34 ± 15.98         |

**Table S2.** Summary of several key characteristics of PGA/SF-DFO scaffolds in comparison with other silk fibroin-based composites.

| Compo-site          | Drug       | Sustained release time               | Tensile strength (MPa) | Mass reduction(%)                          | Would closure rate   | Targeted application     | Refer-ences |
|---------------------|------------|--------------------------------------|------------------------|--------------------------------------------|----------------------|--------------------------|-------------|
| PGA/SF-DFO          | DFO        | 80% at 72 h                          | 2.68 ± 0.94            | Degradation of 80% at 14 d                 | 90.37% at 14 d       | Diabetic wound healing   | This work   |
| SF/CS/SA with DS    | DS         | 50% at 100 min                       | 2.63 ± 0.35            | -                                          | -                    | -                        | 77          |
| CU-SF-PCL           | CU         | 53.48 ± 5.21% at 12 h                | 17.54 ± 1.3            | Degradation of 90% at 14 d                 | 91.67% at 14 d       | Diabetic wound healing   | 3           |
| CU-SF-PVA           | CU         | 75.48 ± 3.85% at 12 h                | 12.41 ± 1.24           | Completely degradation on day 4            | 94.95% at 14 d       | Diabetic wound healing   | 3           |
| AS-loaded SF/GT     | AS         | 80% within 12 h and over 95% at 36 h | -                      | -                                          | Over 90% at 14 d     | Wound healing            | 78          |
| SF-fenu-greek (1:1) | Fenu-greek | 73 ± 0.9 % within 24 h               | 4.57 ± 0.19            | -                                          | 95.8 % at 12 d       | Excisional wound healing | 79          |
| HA-SF-3ZO           | ZO         | over the pe-riod of 14 days          | 7.12 ± 0.17            | Degradation of 24.65 ± 1.76% during 1 week | 55.02 ± 1.35% at 7 d | Burn wound healing       | 80          |

CS-Chitosan; SA-Sodium alginate; DS-diclofenac sodium; CU-Curcumin; PVA-polyvinyl alcohol; PCL-polycaprolactone; AS-astragaloside; GT-gelatin; HA-hyaluronic acid; ZO-zinc oxide.

**Table S3.** Ultimate Tensile Strength, Strain at Break and Young's Modulus of Skin from Normal and Diabetic Mice.

|               | ultimate tensile strength (MPa) | strain at break (%) | Young's modulus (MPa) |
|---------------|---------------------------------|---------------------|-----------------------|
| Normal skin   | 13.17 ± 0.76                    | 134.05 ± 9.34       | 16.91 ± 1.62          |
| Diabetic skin | 8.25 ± 0.61                     | 109.84 ± 5.13       | 11.92 ± 1.34          |

**Table S4.** Ultimate Tensile Strength, Strain at Break and Young's Modulus of Wound Beds from Control, PGA/SF, PGA/SF-DFO Group at Day 14.

|            | ultimate tensile strength (MPa) | strain at break (%) | Young's modulus (MPa) |
|------------|---------------------------------|---------------------|-----------------------|
| control    | 1.71 ± 0.07                     | 96.39 ± 9.18        | 7.16 ± 1.09           |
| PGA/SF     | 2.55 ± 0.13                     | 131.40 ± 8.11       | 6.77 ± 0.96           |
| PGA/SF-DFO | 5.95 ± 0.13                     | 147.58 ± 12.50      | 7.13 ± 0.97           |
